# Supplementary material for: Early diagnosis of dengue disease severity in a resource-limited Asian country
Source: Springer Nature journal article supplement (doi:10.1186/s12879-016-1849-8), 2016-09-26
Supplement: MOESM1 [file 10749268]

# Eligibility Form – Dengue Study (Ve. 120426)

|                                      |                                                            |
|--------------------------------------|------------------------------------------------------------|
| Name Patient .....                   | Study Nurse .....                                          |
| Age             __ __                | Ward <input type="checkbox"/> I <input type="checkbox"/> E |
| Date of Admission  __ __ __ __ __ __ | Time of Admission  __ __ __                                |
| Temperature     __ __ . __           | Fever duration prior admission:  __ __  days               |

|                                        |                             |                                                                                |                                                             |
|----------------------------------------|-----------------------------|--------------------------------------------------------------------------------|-------------------------------------------------------------|
| Fever lasting 2-7 days                 | <input type="checkbox"/> No | <input type="checkbox"/> Yes                                                   | <b>WHO Case Definition 1997</b>                             |
| Criteria1: Headache                    | <input type="checkbox"/> No | <input type="checkbox"/> Yes                                                   | <input type="checkbox"/> Don't know <i>(cannot express)</i> |
| Criteria 2: Retro orbital pain         | <input type="checkbox"/> No | <input type="checkbox"/> Yes                                                   | <input type="checkbox"/> Don't know <i>(cannot express)</i> |
| Criteria 3: Arthralgia                 | <input type="checkbox"/> No | <input type="checkbox"/> Yes                                                   | <input type="checkbox"/> Don't know <i>(cannot express)</i> |
| Criteria 4: Myalgia                    | <input type="checkbox"/> No | <input type="checkbox"/> Yes                                                   | <input type="checkbox"/> Don't know <i>(cannot express)</i> |
| Criteria 5: Rash                       | <input type="checkbox"/> No | <input type="checkbox"/> Yes                                                   |                                                             |
| Criteria 6: Hemorrhagic Manifestations | <input type="checkbox"/> No | <input type="checkbox"/> Yes                                                   |                                                             |
| Criteria 7: Leukopenia                 | <input type="checkbox"/> No | <input type="checkbox"/> Yes (< 5 x 10 <sup>9</sup> / L)                       |                                                             |
| Eligibility WHO 1997                   | <input type="checkbox"/> No | <input type="checkbox"/> Yes <i>(fever 2-7 days, plus at least 2 criteria)</i> |                                                             |

|                                                                                                   |                               |                                                                                       |                                        |
|---------------------------------------------------------------------------------------------------|-------------------------------|---------------------------------------------------------------------------------------|----------------------------------------|
| Fever lasting 2–7 days                                                                            | <input type="checkbox"/> No   | <input type="checkbox"/> Yes                                                          | <b>WHO Case Definition 2009</b>        |
| Criteria1: Nausea, vomiting                                                                       | <input type="checkbox"/> No   | <input type="checkbox"/> Yes                                                          |                                        |
| Criteria 2: Rash                                                                                  | <input type="checkbox"/> No   | <input type="checkbox"/> Yes                                                          |                                        |
| Criteria 3: Aches and pains                                                                       | <input type="checkbox"/> No   | <input type="checkbox"/> Yes                                                          |                                        |
| Criteria 4: Tourniquet test                                                                       | <input type="checkbox"/> Neg. | <input type="checkbox"/> Pos.                                                         | <input type="checkbox"/> Not performed |
| Criteria 5: Leukopenia                                                                            | <input type="checkbox"/> No   | <input type="checkbox"/> Yes (< 5 x 10 <sup>9</sup> / L)                              |                                        |
| Criteria 6: Warning signs                                                                         | <input type="checkbox"/> No   | <input type="checkbox"/> Yes <i>(specify which ones below)</i>                        |                                        |
| <input type="checkbox"/> Abdominal pain, tenderness <input type="checkbox"/> Persistent vomiting  |                               |                                                                                       |                                        |
| <input type="checkbox"/> Clinical fluid accumulation <i>(ascites, pleural effusion ...)</i>       |                               |                                                                                       |                                        |
| <input type="checkbox"/> Lethargy, restlessness <input type="checkbox"/> Liver enlargement > 2 cm |                               |                                                                                       |                                        |
| <input type="checkbox"/> Mucosal bleed <i>(bleeding nose, bleeding gums...)</i>                   |                               |                                                                                       |                                        |
| <input type="checkbox"/> Increased haematocrit and / or rapid decrease of platelets               |                               |                                                                                       |                                        |
| Eligibility WHO 2009                                                                              | <input type="checkbox"/> No   | <input type="checkbox"/> Yes <i>(fever lasting 2-7 days, and at least 2 criteria)</i> |                                        |

Outcome:  Not Eligible     Eligible but Refusal     Eligible: ID |\_\_|\_\_|\_\_|\_\_|

Validation: Dr .....

Signature

# Eligibility Form – Dengue Study (Ve. 120426)

## REFUSAL BOX

If parents refuse the inclusion of the child, fill the eligibility card, and report below the reason for the refusal

My child is too young

My child is too sick

Other reason, *please specify*: .....
