# Supplementary material for: Early diagnosis of dengue disease severity in a resource-limited Asian country
Source: Springer Nature journal article supplement (doi:10.1186/s12879-016-1849-8), 2016-09-26
Supplement: MOESM2 [file 10749268]

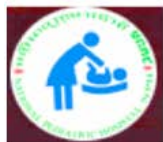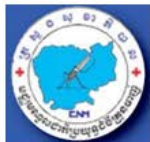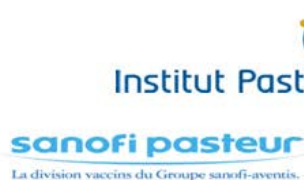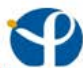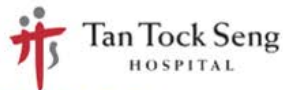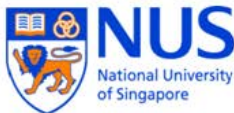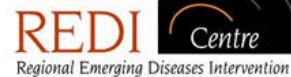

## CASE REPORT FORM

*(April 2012)*

### Surveillance of Paediatric Dengue

National Paediatric Hospital, Phnom Penh  
Kingdom of Cambodia

Study contact:

I am confident that the information supplied in this case record form is complete and accurate data. I confirm that the study was conducted in accordance with the protocol and any protocol amendments and that written informed consent was obtained prior to the study.

Name of the Investigator:

Investigator's Signature:

Date of signature:   /   /

Subject Initials: I\_\_I\_\_I\_\_I

Subject ID Number I\_\_I\_\_I\_\_I\_\_I

**I. Informed Consent****Written informed consent must be given by the parents before inclusion in this study.**តើមាននៃការយល់ព្រមបានផ្តល់ឱ្យឬទេ? / Has informed consent been given?  No  Yes

If NO, do NOT proceed.

**II. ការសំរាកព្យាបាល/Admission**ថ្ងៃចូលសំរាកព្យាបាល/Date  /  /   ម៉ោង/Time  / បន្ទប់/Ward  Infectious Diseases  Emergency Admission Number \_\_\_\_\_**Demographic Data**អាយុ/Age   Years or   Months ភេទ/Sex  ប្រុស/Male  ស្រី/Female

Address: \_\_\_\_\_

**Medical History**Previous dengue infection  No  Yes  Don't know How recently?   Months  
Confirmed where? \_\_\_\_\_ or   Yrs agoHistory of YF Vaccination  No  Yes  Don't knowHistory of JE vaccination  No  Yes  Don't knowFever days prior to admission I   DaysInfusion prior to admission  No  Yes  Don't know**Symptoms on Admission (Day I)**

|                     |                             |                              |                            |                             |                              |
|---------------------|-----------------------------|------------------------------|----------------------------|-----------------------------|------------------------------|
| Fever               | <input type="checkbox"/> No | <input type="checkbox"/> Yes | History Fever (2-7 days)   | <input type="checkbox"/> No | <input type="checkbox"/> Yes |
| Chills              | <input type="checkbox"/> No | <input type="checkbox"/> Yes | Rash                       | <input type="checkbox"/> No | <input type="checkbox"/> Yes |
| Pallor or cool skin | <input type="checkbox"/> No | <input type="checkbox"/> Yes | Vomiting                   | <input type="checkbox"/> No | <input type="checkbox"/> Yes |
| Headache            | <input type="checkbox"/> No | <input type="checkbox"/> Yes | Nausea                     | <input type="checkbox"/> No | <input type="checkbox"/> Yes |
| Retro-orbital pain  | <input type="checkbox"/> No | <input type="checkbox"/> Yes | Anorexia                   | <input type="checkbox"/> No | <input type="checkbox"/> Yes |
| Muscle pain         | <input type="checkbox"/> No | <input type="checkbox"/> Yes | Abdominal pain             | <input type="checkbox"/> No | <input type="checkbox"/> Yes |
| Joint pain          | <input type="checkbox"/> No | <input type="checkbox"/> Yes | Abdominal distension       | <input type="checkbox"/> No | <input type="checkbox"/> Yes |
| Backache            | <input type="checkbox"/> No | <input type="checkbox"/> Yes | Diarrhoea (> 3 stools/day) | <input type="checkbox"/> No | <input type="checkbox"/> Yes |
| Convulsion or coma  | <input type="checkbox"/> No | <input type="checkbox"/> Yes | Jaundice                   | <input type="checkbox"/> No | <input type="checkbox"/> Yes |
| Restless            | <input type="checkbox"/> No | <input type="checkbox"/> Yes | Sore throat                | <input type="checkbox"/> No | <input type="checkbox"/> Yes |
| Lethargy            | <input type="checkbox"/> No | <input type="checkbox"/> Yes | Cough                      | <input type="checkbox"/> No | <input type="checkbox"/> Yes |
| Confusion           | <input type="checkbox"/> No | <input type="checkbox"/> Yes | Breathlessness             | <input type="checkbox"/> No | <input type="checkbox"/> Yes |

Other (specify): \_\_\_\_\_

Subjects Initials I \_ I \_ I \_ I

Subject ID Number I \_ I \_ I \_ I \_ I

**Clinical Examination on Admission (Day I)**

លក្ខខណ្ឌទូទៅ/General condition    <sub>1</sub> មើលទៅល្អ/Looks Well    <sub>2</sub> មើលទៅមិនល្អ/Looks Unwell  
 ទំងន់/Weight      .  kg    កម្ពស់/Height       cm  
 សីតុណ្ហភាព/Temperature      .  °C (digital)    ដំឡើង/Pulse       bpm  
 សំពាធឈាម/Blood Pressure       /   mm Hg    កំហាប់អុកស៊ីសែន/SaO2    I \_ I \_ I \_ I %

**Haemorrhagic Manifestations**

**Dry Bleeding**

Petechiae    <sub>0</sub> No    <sub>1</sub> Yes  
 Purpura or ecchymosis    <sub>0</sub> No    <sub>1</sub> Yes

**Wet Bleeding**

Bleeding nose (epistaxis)    <sub>0</sub> No    <sub>1</sub> Moderate    <sub>2</sub> Severe  
 Bleeding gums    <sub>0</sub> No    <sub>1</sub> Moderate    <sub>2</sub> Severe  
 Hematemesis, melena    <sub>0</sub> No    <sub>1</sub> Moderate    <sub>2</sub> Severe  
 Hematuria    <sub>0</sub> No    <sub>1</sub> Moderate    <sub>2</sub> Severe  
 Vaginal bleeding    <sub>0</sub> No    <sub>1</sub> Moderate    <sub>2</sub> Severe

Tourniquet test    <sub>0</sub> Negative    <sub>1</sub> Positive    <sub>9</sub> Not Done

**Warning Signs**

Abdominal tenderness    <sub>0</sub> No    <sub>1</sub> Yes  
 Persistent vomiting    <sub>0</sub> No    <sub>1</sub> Yes  
 Lethargy/restlessness    <sub>0</sub> No    <sub>1</sub> Yes  
 Liver enlargement > 2 cm    <sub>0</sub> No    <sub>1</sub> Yes

**Plasma Leakage**

Ascites    <sub>0</sub> No    <sub>1</sub> Yes  
 Pleural effusion    <sub>0</sub> No    <sub>1</sub> Yes  
 Facial Oedema    <sub>0</sub> No    <sub>1</sub> Yes

**Shock Signs**

Cold / clammy extremities    <sub>0</sub> No    <sub>1</sub> Yes  
 Hypotension, weak/undetectable pulse    <sub>0</sub> No    <sub>1</sub> Yes  
 Delayed capillary refill (> than 3 seconds)    <sub>0</sub> No    <sub>1</sub> Yes  
 Narrow pulse pressure ( $\leq 20$  mm Hg)    <sub>0</sub> No    <sub>1</sub> Yes

**Other Complications**

Coma / Impaired Consciousness    <sub>0</sub> No    <sub>1</sub> Yes  
 Heart Failure    <sub>0</sub> No    <sub>1</sub> Yes  
 Myocardopathy    <sub>0</sub> No    <sub>1</sub> Yes  
 Respiratory Distress    <sub>0</sub> No    <sub>1</sub> Yes  
 Encephalitis, Encephalopathy    <sub>0</sub> No    <sub>1</sub> Yes  
 Acute Liver Failure    <sub>0</sub> No    <sub>1</sub> Yes  
 Acute Renal Failure    <sub>0</sub> No    <sub>1</sub> Yes

**Treatment on Admission (Day I)**

|                               |                                          |                                           |                                                                                                     |                                          |                                           |
|-------------------------------|------------------------------------------|-------------------------------------------|-----------------------------------------------------------------------------------------------------|------------------------------------------|-------------------------------------------|
| Corticosteroid                | <input type="checkbox"/> <sub>0</sub> No | <input type="checkbox"/> <sub>1</sub> Yes | Paracetamol                                                                                         | <input type="checkbox"/> <sub>0</sub> No | <input type="checkbox"/> <sub>1</sub> Yes |
| NSAID                         | <input type="checkbox"/> <sub>0</sub> No | <input type="checkbox"/> <sub>1</sub> Yes | Antibiotic                                                                                          | <input type="checkbox"/> <sub>0</sub> No | <input type="checkbox"/> <sub>1</sub> Yes |
| Aspirin                       | <input type="checkbox"/> <sub>0</sub> No | <input type="checkbox"/> <sub>1</sub> Yes |                                                                                                     |                                          |                                           |
| Lactate Ringer's              | <input type="checkbox"/> <sub>0</sub> No | <input type="checkbox"/> <sub>1</sub> Yes | <input type="checkbox"/> <input type="checkbox"/> <input type="checkbox"/> <input type="checkbox"/> | mL total / 24h                           |                                           |
| Acetate Ringer's              | <input type="checkbox"/> <sub>0</sub> No | <input type="checkbox"/> <sub>1</sub> Yes | <input type="checkbox"/> <input type="checkbox"/> <input type="checkbox"/> <input type="checkbox"/> | mL total / 24h                           |                                           |
| 5% Dextrose Lactate Ringer's  | <input type="checkbox"/> <sub>0</sub> No | <input type="checkbox"/> <sub>1</sub> Yes | <input type="checkbox"/> <input type="checkbox"/> <input type="checkbox"/> <input type="checkbox"/> | mL total / 24h                           |                                           |
| 5% Dextrose Acetate Ringer's  | <input type="checkbox"/> <sub>0</sub> No | <input type="checkbox"/> <sub>1</sub> Yes | <input type="checkbox"/> <input type="checkbox"/> <input type="checkbox"/> <input type="checkbox"/> | mL total / 24h                           |                                           |
| 5% Dextrose Normal Saline Sol | <input type="checkbox"/> <sub>0</sub> No | <input type="checkbox"/> <sub>1</sub> Yes | <input type="checkbox"/> <input type="checkbox"/> <input type="checkbox"/> <input type="checkbox"/> | mL total / 24h                           |                                           |
| Dextran 40 Plasma Expander    | <input type="checkbox"/> <sub>0</sub> No | <input type="checkbox"/> <sub>1</sub> Yes | <input type="checkbox"/> <input type="checkbox"/> <input type="checkbox"/> <input type="checkbox"/> | mL total / 24h                           |                                           |
| Blood Transfusion             | <input type="checkbox"/> <sub>0</sub> No | <input type="checkbox"/> <sub>1</sub> Yes | <input type="checkbox"/> <input type="checkbox"/> <input type="checkbox"/> <input type="checkbox"/> | mL                                       |                                           |
| Packed Cells                  | <input type="checkbox"/> <sub>0</sub> No | <input type="checkbox"/> <sub>1</sub> Yes | <input type="checkbox"/> <input type="checkbox"/> <input type="checkbox"/> <input type="checkbox"/> | mL                                       |                                           |

|                                                |                                                                                                     |                |
|------------------------------------------------|-----------------------------------------------------------------------------------------------------|----------------|
| សារជាតិទឹកដែលបរិភោគតាមមាត់/ <b>Oral Intake</b> | <input type="checkbox"/> <input type="checkbox"/> <input type="checkbox"/> <input type="checkbox"/> | mL total / 24h |
| ចំណុះទឹកនោមដែលចូរចេញ/ <b>Urine Outcome</b>     | <input type="checkbox"/> <input type="checkbox"/> <input type="checkbox"/> <input type="checkbox"/> | mL total / 24h |

**Investigations and Lab Testing on Admission (Day I)**

**Haematology**

|             |                                          |                                           |                                                                              |                        |
|-------------|------------------------------------------|-------------------------------------------|------------------------------------------------------------------------------|------------------------|
| Platelets   | <input type="checkbox"/> <sub>0</sub> No | <input type="checkbox"/> <sub>1</sub> Yes | <input type="checkbox"/> <input type="checkbox"/> <input type="checkbox"/>   | (x 10 <sup>9</sup> /L) |
| Leukocytes  | <input type="checkbox"/> <sub>0</sub> No | <input type="checkbox"/> <sub>1</sub> Yes | <input type="checkbox"/> <input type="checkbox"/> . <input type="checkbox"/> | (x 10 <sup>9</sup> /L) |
| Lymphocytes | <input type="checkbox"/> <sub>0</sub> No | <input type="checkbox"/> <sub>1</sub> Yes | <input type="checkbox"/> <input type="checkbox"/> . <input type="checkbox"/> | (x 10 <sup>9</sup> /L) |
| Neutrophils | <input type="checkbox"/> <sub>0</sub> No | <input type="checkbox"/> <sub>1</sub> Yes | <input type="checkbox"/> <input type="checkbox"/> . <input type="checkbox"/> | (x 10 <sup>9</sup> /L) |
| Hematocrit  | <input type="checkbox"/> <sub>0</sub> No | <input type="checkbox"/> <sub>1</sub> Yes | <input type="checkbox"/> <input type="checkbox"/>                            | (x 10 <sup>9</sup> /L) |
| Hemoglobin  | <input type="checkbox"/> <sub>0</sub> No | <input type="checkbox"/> <sub>1</sub> Yes | <input type="checkbox"/> <input type="checkbox"/> . <input type="checkbox"/> | (%)                    |
| MCV         | <input type="checkbox"/> <sub>0</sub> No | <input type="checkbox"/> <sub>1</sub> Yes | <input type="checkbox"/> <input type="checkbox"/>                            | (g/dL)                 |
| MCH         | <input type="checkbox"/> <sub>0</sub> No | <input type="checkbox"/> <sub>1</sub> Yes | <input type="checkbox"/> <input type="checkbox"/>                            | (fl)                   |

**Chemistry**

|         |                                          |                                           |                                                                                                     |        |
|---------|------------------------------------------|-------------------------------------------|-----------------------------------------------------------------------------------------------------|--------|
| AST     | <input type="checkbox"/> <sub>0</sub> No | <input type="checkbox"/> <sub>1</sub> Yes | <input type="checkbox"/> <input type="checkbox"/> <input type="checkbox"/> <input type="checkbox"/> | (UI/L) |
| ALT     | <input type="checkbox"/> <sub>0</sub> No | <input type="checkbox"/> <sub>1</sub> Yes | <input type="checkbox"/> <input type="checkbox"/> <input type="checkbox"/> <input type="checkbox"/> | (UI/L) |
| Protein | <input type="checkbox"/> <sub>0</sub> No | <input type="checkbox"/> <sub>1</sub> Yes | <input type="checkbox"/> <input type="checkbox"/>                                                   | (g/L)  |

**Ultrasound**

|             |                                               |                                                    |                                                                                                    |
|-------------|-----------------------------------------------|----------------------------------------------------|----------------------------------------------------------------------------------------------------|
|             | <input type="checkbox"/> <sub>1</sub> Normal  | <input type="checkbox"/> <sub>2</sub> Abnormal     | <input type="checkbox"/> <sub>9</sub> Not Done                                                     |
| If abnormal | <input type="checkbox"/> <sub>1</sub> Ascitis | <input type="checkbox"/> <sub>2</sub> Hepatomegaly | <input type="checkbox"/> <sub>3</sub> Pleural effusion <input type="checkbox"/> <sub>4</sub> Other |

|                  | Day II                                                                                  | Day III                                                                                 | Day IV                                                                                  | Day V                                                                                   |
|------------------|-----------------------------------------------------------------------------------------|-----------------------------------------------------------------------------------------|-----------------------------------------------------------------------------------------|-----------------------------------------------------------------------------------------|
| Date             | <input type="text"/> / <input type="text"/>                                             | <input type="text"/> / <input type="text"/>                                             | <input type="text"/> / <input type="text"/>                                             | <input type="text"/> / <input type="text"/>                                             |
| Day of fever     | <input type="text"/>                                                                    | <input type="text"/>                                                                    | <input type="text"/>                                                                    | <input type="text"/>                                                                    |
| General status   | <input type="checkbox"/> <sub>1</sub> Well <input type="checkbox"/> <sub>2</sub> Unwell | <input type="checkbox"/> <sub>1</sub> Well <input type="checkbox"/> <sub>2</sub> Unwell | <input type="checkbox"/> <sub>1</sub> Well <input type="checkbox"/> <sub>2</sub> Unwell | <input type="checkbox"/> <sub>1</sub> Well <input type="checkbox"/> <sub>2</sub> Unwell |
| Temperature (°C) | <input type="text"/> . <input type="text"/>                                             | <input type="text"/> . <input type="text"/>                                             | <input type="text"/> . <input type="text"/>                                             | <input type="text"/> . <input type="text"/>                                             |
| Pulse (bpm)      | <input type="text"/>                                                                    | <input type="text"/>                                                                    | <input type="text"/>                                                                    | <input type="text"/>                                                                    |
| Systolic BP      | <input type="text"/>                                                                    | <input type="text"/>                                                                    | <input type="text"/>                                                                    | <input type="text"/>                                                                    |
| Diastolic BP     | <input type="text"/>                                                                    | <input type="text"/>                                                                    | <input type="text"/>                                                                    | <input type="text"/>                                                                    |
| SaO2 % (%)       | <input type="text"/>                                                                    | <input type="text"/>                                                                    | <input type="text"/>                                                                    | <input type="text"/>                                                                    |

| Hemorrhagic Manifestations |                                         |                                         |                                         |                                         |                                         |                                         |                                         |                                         |                                         |                                         |
|----------------------------|-----------------------------------------|-----------------------------------------|-----------------------------------------|-----------------------------------------|-----------------------------------------|-----------------------------------------|-----------------------------------------|-----------------------------------------|-----------------------------------------|-----------------------------------------|
| Petechiae                  | <input type="checkbox"/> <sub>0</sub> N | <input type="checkbox"/> <sub>1</sub> Y | <input type="checkbox"/> <sub>0</sub> N | <input type="checkbox"/> <sub>1</sub> Y | <input type="checkbox"/> <sub>0</sub> N | <input type="checkbox"/> <sub>1</sub> Y | <input type="checkbox"/> <sub>0</sub> N | <input type="checkbox"/> <sub>1</sub> Y | <input type="checkbox"/> <sub>0</sub> N | <input type="checkbox"/> <sub>1</sub> Y |
| Purpura / ecchymosis       | <input type="checkbox"/> <sub>0</sub> N | <input type="checkbox"/> <sub>1</sub> Y | <input type="checkbox"/> <sub>0</sub> N | <input type="checkbox"/> <sub>1</sub> Y | <input type="checkbox"/> <sub>0</sub> N | <input type="checkbox"/> <sub>1</sub> Y | <input type="checkbox"/> <sub>0</sub> N | <input type="checkbox"/> <sub>1</sub> Y | <input type="checkbox"/> <sub>0</sub> N | <input type="checkbox"/> <sub>1</sub> Y |
| Bleeding nose / gums       | <input type="checkbox"/> <sub>0</sub> N | <input type="checkbox"/> <sub>1</sub> Y | <input type="checkbox"/> <sub>0</sub> N | <input type="checkbox"/> <sub>1</sub> Y | <input type="checkbox"/> <sub>0</sub> N | <input type="checkbox"/> <sub>1</sub> Y | <input type="checkbox"/> <sub>0</sub> N | <input type="checkbox"/> <sub>1</sub> Y | <input type="checkbox"/> <sub>0</sub> N | <input type="checkbox"/> <sub>1</sub> Y |
| Hematemesis / melena       | <input type="checkbox"/> <sub>0</sub> N | <input type="checkbox"/> <sub>1</sub> Y | <input type="checkbox"/> <sub>0</sub> N | <input type="checkbox"/> <sub>1</sub> Y | <input type="checkbox"/> <sub>0</sub> N | <input type="checkbox"/> <sub>1</sub> Y | <input type="checkbox"/> <sub>0</sub> N | <input type="checkbox"/> <sub>1</sub> Y | <input type="checkbox"/> <sub>0</sub> N | <input type="checkbox"/> <sub>1</sub> Y |
| Vaginal bleeding           | <input type="checkbox"/> <sub>0</sub> N | <input type="checkbox"/> <sub>1</sub> Y | <input type="checkbox"/> <sub>0</sub> N | <input type="checkbox"/> <sub>1</sub> Y | <input type="checkbox"/> <sub>0</sub> N | <input type="checkbox"/> <sub>1</sub> Y | <input type="checkbox"/> <sub>0</sub> N | <input type="checkbox"/> <sub>1</sub> Y | <input type="checkbox"/> <sub>0</sub> N | <input type="checkbox"/> <sub>1</sub> Y |
| Tourniquet Test            | <input type="checkbox"/>                | <input type="checkbox"/>                | <input type="checkbox"/>                | <input type="checkbox"/>                | <input type="checkbox"/>                | <input type="checkbox"/>                | <input type="checkbox"/>                | <input type="checkbox"/>                | <input type="checkbox"/>                | <input type="checkbox"/>                |

*(Code "0" Negative, "1" for positive, "9" for not performed)*

| Warning Signs          |                                         |                                         |                                         |                                         |                                         |                                         |                                         |                                         |                                         |                                         |
|------------------------|-----------------------------------------|-----------------------------------------|-----------------------------------------|-----------------------------------------|-----------------------------------------|-----------------------------------------|-----------------------------------------|-----------------------------------------|-----------------------------------------|-----------------------------------------|
| Abdominal tenderness   | <input type="checkbox"/> <sub>0</sub> N | <input type="checkbox"/> <sub>1</sub> Y | <input type="checkbox"/> <sub>0</sub> N | <input type="checkbox"/> <sub>1</sub> Y | <input type="checkbox"/> <sub>0</sub> N | <input type="checkbox"/> <sub>1</sub> Y | <input type="checkbox"/> <sub>0</sub> N | <input type="checkbox"/> <sub>1</sub> Y | <input type="checkbox"/> <sub>0</sub> N | <input type="checkbox"/> <sub>1</sub> Y |
| Persistent vomiting    | <input type="checkbox"/> <sub>0</sub> N | <input type="checkbox"/> <sub>1</sub> Y | <input type="checkbox"/> <sub>0</sub> N | <input type="checkbox"/> <sub>1</sub> Y | <input type="checkbox"/> <sub>0</sub> N | <input type="checkbox"/> <sub>1</sub> Y | <input type="checkbox"/> <sub>0</sub> N | <input type="checkbox"/> <sub>1</sub> Y | <input type="checkbox"/> <sub>0</sub> N | <input type="checkbox"/> <sub>1</sub> Y |
| Lethargy/ restlessness | <input type="checkbox"/> <sub>0</sub> N | <input type="checkbox"/> <sub>1</sub> Y | <input type="checkbox"/> <sub>0</sub> N | <input type="checkbox"/> <sub>1</sub> Y | <input type="checkbox"/> <sub>0</sub> N | <input type="checkbox"/> <sub>1</sub> Y | <input type="checkbox"/> <sub>0</sub> N | <input type="checkbox"/> <sub>1</sub> Y | <input type="checkbox"/> <sub>0</sub> N | <input type="checkbox"/> <sub>1</sub> Y |
| Liver enlargement      | <input type="checkbox"/> <sub>0</sub> N | <input type="checkbox"/> <sub>1</sub> Y | <input type="checkbox"/> <sub>0</sub> N | <input type="checkbox"/> <sub>1</sub> Y | <input type="checkbox"/> <sub>0</sub> N | <input type="checkbox"/> <sub>1</sub> Y | <input type="checkbox"/> <sub>0</sub> N | <input type="checkbox"/> <sub>1</sub> Y | <input type="checkbox"/> <sub>0</sub> N | <input type="checkbox"/> <sub>1</sub> Y |

| Plasma Leakage Signs |                                         |                                         |                                         |                                         |                                         |                                         |                                         |                                         |                                         |                                         |
|----------------------|-----------------------------------------|-----------------------------------------|-----------------------------------------|-----------------------------------------|-----------------------------------------|-----------------------------------------|-----------------------------------------|-----------------------------------------|-----------------------------------------|-----------------------------------------|
| Ascites              | <input type="checkbox"/> <sub>0</sub> N | <input type="checkbox"/> <sub>1</sub> Y | <input type="checkbox"/> <sub>0</sub> N | <input type="checkbox"/> <sub>1</sub> Y | <input type="checkbox"/> <sub>0</sub> N | <input type="checkbox"/> <sub>1</sub> Y | <input type="checkbox"/> <sub>0</sub> N | <input type="checkbox"/> <sub>1</sub> Y | <input type="checkbox"/> <sub>0</sub> N | <input type="checkbox"/> <sub>1</sub> Y |
| Pleural effusion     | <input type="checkbox"/> <sub>0</sub> N | <input type="checkbox"/> <sub>1</sub> Y | <input type="checkbox"/> <sub>0</sub> N | <input type="checkbox"/> <sub>1</sub> Y | <input type="checkbox"/> <sub>0</sub> N | <input type="checkbox"/> <sub>1</sub> Y | <input type="checkbox"/> <sub>0</sub> N | <input type="checkbox"/> <sub>1</sub> Y | <input type="checkbox"/> <sub>0</sub> N | <input type="checkbox"/> <sub>1</sub> Y |
| Facial edema         | <input type="checkbox"/> <sub>0</sub> N | <input type="checkbox"/> <sub>1</sub> Y | <input type="checkbox"/> <sub>0</sub> N | <input type="checkbox"/> <sub>1</sub> Y | <input type="checkbox"/> <sub>0</sub> N | <input type="checkbox"/> <sub>1</sub> Y | <input type="checkbox"/> <sub>0</sub> N | <input type="checkbox"/> <sub>1</sub> Y | <input type="checkbox"/> <sub>0</sub> N | <input type="checkbox"/> <sub>1</sub> Y |
| Ultrasound           | <input type="checkbox"/>                | <input type="checkbox"/>                | <input type="checkbox"/>                | <input type="checkbox"/>                | <input type="checkbox"/>                | <input type="checkbox"/>                | <input type="checkbox"/>                | <input type="checkbox"/>                | <input type="checkbox"/>                | <input type="checkbox"/>                |

*(Code "1" for normal, "2" for abnormal, "9" for not performed)*

If abnormal, specify

*(Code "1" for ascites, "2" for hepatomegaly, "3" for pleural effusion, and "4" for other)*

| Shocks Signs                            |                                         |                                         |                                         |                                         |                                         |                                         |                                         |                                         |                                         |                                         |
|-----------------------------------------|-----------------------------------------|-----------------------------------------|-----------------------------------------|-----------------------------------------|-----------------------------------------|-----------------------------------------|-----------------------------------------|-----------------------------------------|-----------------------------------------|-----------------------------------------|
| Cold / clammy extremities               | <input type="checkbox"/> <sub>0</sub> N | <input type="checkbox"/> <sub>1</sub> Y | <input type="checkbox"/> <sub>0</sub> N | <input type="checkbox"/> <sub>1</sub> Y | <input type="checkbox"/> <sub>0</sub> N | <input type="checkbox"/> <sub>1</sub> Y | <input type="checkbox"/> <sub>0</sub> N | <input type="checkbox"/> <sub>1</sub> Y | <input type="checkbox"/> <sub>0</sub> N | <input type="checkbox"/> <sub>1</sub> Y |
| Hypotension, weak or undetectable pulse | <input type="checkbox"/> <sub>0</sub> N | <input type="checkbox"/> <sub>1</sub> Y | <input type="checkbox"/> <sub>0</sub> N | <input type="checkbox"/> <sub>1</sub> Y | <input type="checkbox"/> <sub>0</sub> N | <input type="checkbox"/> <sub>1</sub> Y | <input type="checkbox"/> <sub>0</sub> N | <input type="checkbox"/> <sub>1</sub> Y | <input type="checkbox"/> <sub>0</sub> N | <input type="checkbox"/> <sub>1</sub> Y |
| Delayed capillary refill                | <input type="checkbox"/> <sub>0</sub> N | <input type="checkbox"/> <sub>1</sub> Y | <input type="checkbox"/> <sub>0</sub> N | <input type="checkbox"/> <sub>1</sub> Y | <input type="checkbox"/> <sub>0</sub> N | <input type="checkbox"/> <sub>1</sub> Y | <input type="checkbox"/> <sub>0</sub> N | <input type="checkbox"/> <sub>1</sub> Y | <input type="checkbox"/> <sub>0</sub> N | <input type="checkbox"/> <sub>1</sub> Y |
| Narrow pulse pressure                   | <input type="checkbox"/> <sub>0</sub> N | <input type="checkbox"/> <sub>1</sub> Y | <input type="checkbox"/> <sub>0</sub> N | <input type="checkbox"/> <sub>1</sub> Y | <input type="checkbox"/> <sub>0</sub> N | <input type="checkbox"/> <sub>1</sub> Y | <input type="checkbox"/> <sub>0</sub> N | <input type="checkbox"/> <sub>1</sub> Y | <input type="checkbox"/> <sub>0</sub> N | <input type="checkbox"/> <sub>1</sub> Y |
| Coma / Impaired Consciousness           | <input type="checkbox"/> <sub>0</sub> N | <input type="checkbox"/> <sub>1</sub> Y | <input type="checkbox"/> <sub>0</sub> N | <input type="checkbox"/> <sub>1</sub> Y | <input type="checkbox"/> <sub>0</sub> N | <input type="checkbox"/> <sub>1</sub> Y | <input type="checkbox"/> <sub>0</sub> N | <input type="checkbox"/> <sub>1</sub> Y | <input type="checkbox"/> <sub>0</sub> N | <input type="checkbox"/> <sub>1</sub> Y |
| Other Severe Organ Involvement          | <input type="checkbox"/> <sub>0</sub> N | <input type="checkbox"/> <sub>1</sub> Y | <input type="checkbox"/> <sub>0</sub> N | <input type="checkbox"/> <sub>1</sub> Y | <input type="checkbox"/> <sub>0</sub> N | <input type="checkbox"/> <sub>1</sub> Y | <input type="checkbox"/> <sub>0</sub> N | <input type="checkbox"/> <sub>1</sub> Y | <input type="checkbox"/> <sub>0</sub> N | <input type="checkbox"/> <sub>1</sub> Y |

Subjects Initials I \_ I \_ I \_ I

Subject ID Number I \_ I \_ I \_ I \_ I

|      | Day I _ I                                                                             | Day I _ I                                                                             | Day I _ I                                                                             | Day I _ I                                                                             |
|------|---------------------------------------------------------------------------------------|---------------------------------------------------------------------------------------|---------------------------------------------------------------------------------------|---------------------------------------------------------------------------------------|
| Date | <input type="text"/> <input type="text"/> / <input type="text"/> <input type="text"/> | <input type="text"/> <input type="text"/> / <input type="text"/> <input type="text"/> | <input type="text"/> <input type="text"/> / <input type="text"/> <input type="text"/> | <input type="text"/> <input type="text"/> / <input type="text"/> <input type="text"/> |

**Medications**

|                |                                                                                 |                                                                                 |                                                                                 |                                                                                 |
|----------------|---------------------------------------------------------------------------------|---------------------------------------------------------------------------------|---------------------------------------------------------------------------------|---------------------------------------------------------------------------------|
| Corticosteroid | <input type="checkbox"/> <sub>0</sub> N <input type="checkbox"/> <sub>1</sub> Y | <input type="checkbox"/> <sub>0</sub> N <input type="checkbox"/> <sub>1</sub> Y | <input type="checkbox"/> <sub>0</sub> N <input type="checkbox"/> <sub>1</sub> Y | <input type="checkbox"/> <sub>0</sub> N <input type="checkbox"/> <sub>1</sub> Y |
| NSAID          | <input type="checkbox"/> <sub>0</sub> N <input type="checkbox"/> <sub>1</sub> Y | <input type="checkbox"/> <sub>0</sub> N <input type="checkbox"/> <sub>1</sub> Y | <input type="checkbox"/> <sub>0</sub> N <input type="checkbox"/> <sub>1</sub> Y | <input type="checkbox"/> <sub>0</sub> N <input type="checkbox"/> <sub>1</sub> Y |
| Aspirin        | <input type="checkbox"/> <sub>0</sub> N <input type="checkbox"/> <sub>1</sub> Y | <input type="checkbox"/> <sub>0</sub> N <input type="checkbox"/> <sub>1</sub> Y | <input type="checkbox"/> <sub>0</sub> N <input type="checkbox"/> <sub>1</sub> Y | <input type="checkbox"/> <sub>0</sub> N <input type="checkbox"/> <sub>1</sub> Y |
| Paracetamol    | <input type="checkbox"/> <sub>0</sub> N <input type="checkbox"/> <sub>1</sub> Y | <input type="checkbox"/> <sub>0</sub> N <input type="checkbox"/> <sub>1</sub> Y | <input type="checkbox"/> <sub>0</sub> N <input type="checkbox"/> <sub>1</sub> Y | <input type="checkbox"/> <sub>0</sub> N <input type="checkbox"/> <sub>1</sub> Y |
| Antibiotic     | <input type="checkbox"/> <sub>0</sub> N <input type="checkbox"/> <sub>1</sub> Y | <input type="checkbox"/> <sub>0</sub> N <input type="checkbox"/> <sub>1</sub> Y | <input type="checkbox"/> <sub>0</sub> N <input type="checkbox"/> <sub>1</sub> Y | <input type="checkbox"/> <sub>0</sub> N <input type="checkbox"/> <sub>1</sub> Y |

**Fluid infusion**

|                   |                                                                                                                                                                    |                                                                                                                                                                    |                                                                                                                                                                    |                                                                                                                                                                    |
|-------------------|--------------------------------------------------------------------------------------------------------------------------------------------------------------------|--------------------------------------------------------------------------------------------------------------------------------------------------------------------|--------------------------------------------------------------------------------------------------------------------------------------------------------------------|--------------------------------------------------------------------------------------------------------------------------------------------------------------------|
| Lactate Ringer's  | <input type="checkbox"/> <sub>N</sub> <input type="checkbox"/> <sub>Y</sub> <input type="text"/> <input type="text"/> <input type="text"/> <input type="text"/> mL | <input type="checkbox"/> <sub>N</sub> <input type="checkbox"/> <sub>Y</sub> <input type="text"/> <input type="text"/> <input type="text"/> <input type="text"/> mL | <input type="checkbox"/> <sub>N</sub> <input type="checkbox"/> <sub>Y</sub> <input type="text"/> <input type="text"/> <input type="text"/> <input type="text"/> mL | <input type="checkbox"/> <sub>N</sub> <input type="checkbox"/> <sub>Y</sub> <input type="text"/> <input type="text"/> <input type="text"/> <input type="text"/> mL |
| Acetate Ringer's  | <input type="checkbox"/> <sub>N</sub> <input type="checkbox"/> <sub>Y</sub> <input type="text"/> <input type="text"/> <input type="text"/> <input type="text"/> mL | <input type="checkbox"/> <sub>N</sub> <input type="checkbox"/> <sub>Y</sub> <input type="text"/> <input type="text"/> <input type="text"/> <input type="text"/> mL | <input type="checkbox"/> <sub>N</sub> <input type="checkbox"/> <sub>Y</sub> <input type="text"/> <input type="text"/> <input type="text"/> <input type="text"/> mL | <input type="checkbox"/> <sub>N</sub> <input type="checkbox"/> <sub>Y</sub> <input type="text"/> <input type="text"/> <input type="text"/> <input type="text"/> mL |
| D5 Ringer Lactate | <input type="checkbox"/> <sub>N</sub> <input type="checkbox"/> <sub>Y</sub> <input type="text"/> <input type="text"/> <input type="text"/> <input type="text"/> mL | <input type="checkbox"/> <sub>N</sub> <input type="checkbox"/> <sub>Y</sub> <input type="text"/> <input type="text"/> <input type="text"/> <input type="text"/> mL | <input type="checkbox"/> <sub>N</sub> <input type="checkbox"/> <sub>Y</sub> <input type="text"/> <input type="text"/> <input type="text"/> <input type="text"/> mL | <input type="checkbox"/> <sub>N</sub> <input type="checkbox"/> <sub>Y</sub> <input type="text"/> <input type="text"/> <input type="text"/> <input type="text"/> mL |
| D5 Ringer Acetate | <input type="checkbox"/> <sub>N</sub> <input type="checkbox"/> <sub>Y</sub> <input type="text"/> <input type="text"/> <input type="text"/> <input type="text"/> mL | <input type="checkbox"/> <sub>N</sub> <input type="checkbox"/> <sub>Y</sub> <input type="text"/> <input type="text"/> <input type="text"/> <input type="text"/> mL | <input type="checkbox"/> <sub>N</sub> <input type="checkbox"/> <sub>Y</sub> <input type="text"/> <input type="text"/> <input type="text"/> <input type="text"/> mL | <input type="checkbox"/> <sub>N</sub> <input type="checkbox"/> <sub>Y</sub> <input type="text"/> <input type="text"/> <input type="text"/> <input type="text"/> mL |
| D5 Normal Saline  | <input type="checkbox"/> <sub>N</sub> <input type="checkbox"/> <sub>Y</sub> <input type="text"/> <input type="text"/> <input type="text"/> <input type="text"/> mL | <input type="checkbox"/> <sub>N</sub> <input type="checkbox"/> <sub>Y</sub> <input type="text"/> <input type="text"/> <input type="text"/> <input type="text"/> mL | <input type="checkbox"/> <sub>N</sub> <input type="checkbox"/> <sub>Y</sub> <input type="text"/> <input type="text"/> <input type="text"/> <input type="text"/> mL | <input type="checkbox"/> <sub>N</sub> <input type="checkbox"/> <sub>Y</sub> <input type="text"/> <input type="text"/> <input type="text"/> <input type="text"/> mL |
| Dextran 40        | <input type="checkbox"/> <sub>N</sub> <input type="checkbox"/> <sub>Y</sub> <input type="text"/> <input type="text"/> <input type="text"/> <input type="text"/> mL | <input type="checkbox"/> <sub>N</sub> <input type="checkbox"/> <sub>Y</sub> <input type="text"/> <input type="text"/> <input type="text"/> <input type="text"/> mL | <input type="checkbox"/> <sub>N</sub> <input type="checkbox"/> <sub>Y</sub> <input type="text"/> <input type="text"/> <input type="text"/> <input type="text"/> mL | <input type="checkbox"/> <sub>N</sub> <input type="checkbox"/> <sub>Y</sub> <input type="text"/> <input type="text"/> <input type="text"/> <input type="text"/> mL |
| Blood transfusion | <input type="checkbox"/> <sub>N</sub> <input type="checkbox"/> <sub>Y</sub> <input type="text"/> mL                                                                | <input type="checkbox"/> <sub>N</sub> <input type="checkbox"/> <sub>Y</sub> <input type="text"/> mL                                                                | <input type="checkbox"/> <sub>N</sub> <input type="checkbox"/> <sub>Y</sub> <input type="text"/> mL                                                                | <input type="checkbox"/> <sub>N</sub> <input type="checkbox"/> <sub>Y</sub> <input type="text"/> mL                                                                |
| Packed cells      | <input type="checkbox"/> <sub>N</sub> <input type="checkbox"/> <sub>Y</sub> <input type="text"/> mL                                                                | <input type="checkbox"/> <sub>N</sub> <input type="checkbox"/> <sub>Y</sub> <input type="text"/> mL                                                                | <input type="checkbox"/> <sub>N</sub> <input type="checkbox"/> <sub>Y</sub> <input type="text"/> mL                                                                | <input type="checkbox"/> <sub>N</sub> <input type="checkbox"/> <sub>Y</sub> <input type="text"/> mL                                                                |

|               |                                                                                        |                                                                                        |                                                                                        |                                                                                        |
|---------------|----------------------------------------------------------------------------------------|----------------------------------------------------------------------------------------|----------------------------------------------------------------------------------------|----------------------------------------------------------------------------------------|
| Oral Intake   | <input type="text"/> <input type="text"/> <input type="text"/> <input type="text"/> mL | <input type="text"/> <input type="text"/> <input type="text"/> <input type="text"/> mL | <input type="text"/> <input type="text"/> <input type="text"/> <input type="text"/> mL | <input type="text"/> <input type="text"/> <input type="text"/> <input type="text"/> mL |
| Urine Outcome | <input type="text"/> <input type="text"/> <input type="text"/> <input type="text"/> mL | <input type="text"/> <input type="text"/> <input type="text"/> <input type="text"/> mL | <input type="text"/> <input type="text"/> <input type="text"/> <input type="text"/> mL | <input type="text"/> <input type="text"/> <input type="text"/> <input type="text"/> mL |

**Laboratory (Compulsory)**

|                               |                                                                                       |                                                                                       |                                                                                       |                                                                                       |    |
|-------------------------------|---------------------------------------------------------------------------------------|---------------------------------------------------------------------------------------|---------------------------------------------------------------------------------------|---------------------------------------------------------------------------------------|----|
| Hematocrit ( <i>highest</i> ) | <input type="text"/> <input type="text"/>                                             | <input type="text"/> <input type="text"/>                                             | <input type="text"/> <input type="text"/>                                             | <input type="text"/> <input type="text"/>                                             | In |
| Time:                         | <input type="text"/> <input type="text"/> : <input type="text"/> <input type="text"/> | <input type="text"/> <input type="text"/> : <input type="text"/> <input type="text"/> | <input type="text"/> <input type="text"/> : <input type="text"/> <input type="text"/> | <input type="text"/> <input type="text"/> : <input type="text"/> <input type="text"/> | %  |
| Hematocrit ( <i>lowest</i> )  | <input type="text"/> <input type="text"/>                                             | <input type="text"/> <input type="text"/>                                             | <input type="text"/> <input type="text"/>                                             | <input type="text"/> <input type="text"/>                                             | In |
| Time:                         | <input type="text"/> <input type="text"/> : <input type="text"/> <input type="text"/> | <input type="text"/> <input type="text"/> : <input type="text"/> <input type="text"/> | <input type="text"/> <input type="text"/> : <input type="text"/> <input type="text"/> | <input type="text"/> <input type="text"/> : <input type="text"/> <input type="text"/> | %  |

**Laboratory (Optional)**

|                               |                                                                                     |                                                                                     |                                                                                     |                                                                                     |                       |
|-------------------------------|-------------------------------------------------------------------------------------|-------------------------------------------------------------------------------------|-------------------------------------------------------------------------------------|-------------------------------------------------------------------------------------|-----------------------|
| Platelets ( <i>lowest</i> )   | <input type="text"/> <input type="text"/> <input type="text"/>                      | <input type="text"/> <input type="text"/> <input type="text"/>                      | <input type="text"/> <input type="text"/> <input type="text"/>                      | <input type="text"/> <input type="text"/> <input type="text"/>                      | (x10 <sup>9</sup> /L) |
| Leukocytes ( <i>lowest</i> )  | <input type="text"/> <input type="text"/> . <input type="text"/>                    | <input type="text"/> <input type="text"/> . <input type="text"/>                    | <input type="text"/> <input type="text"/> . <input type="text"/>                    | <input type="text"/> <input type="text"/> . <input type="text"/>                    | (x10 <sup>9</sup> /L) |
| Lymphocytes ( <i>lowest</i> ) | <input type="text"/> <input type="text"/> . <input type="text"/>                    | <input type="text"/> <input type="text"/> . <input type="text"/>                    | <input type="text"/> <input type="text"/> . <input type="text"/>                    | <input type="text"/> <input type="text"/> . <input type="text"/>                    | (x10 <sup>9</sup> /L) |
| Neutrophils                   | <input type="text"/> <input type="text"/> . <input type="text"/>                    | <input type="text"/> <input type="text"/> . <input type="text"/>                    | <input type="text"/> <input type="text"/> . <input type="text"/>                    | <input type="text"/> <input type="text"/> . <input type="text"/>                    | (x10 <sup>9</sup> /L) |
| Hemoglobin ( <i>lowest</i> )  | <input type="text"/> <input type="text"/> . <input type="text"/>                    | <input type="text"/> <input type="text"/> . <input type="text"/>                    | <input type="text"/> <input type="text"/> . <input type="text"/>                    | <input type="text"/> <input type="text"/> . <input type="text"/>                    | (g/dl)                |
| MCV                           | <input type="text"/> <input type="text"/>                                           | <input type="text"/> <input type="text"/>                                           | <input type="text"/> <input type="text"/>                                           | <input type="text"/> <input type="text"/>                                           | (fl)                  |
| MCH                           | <input type="text"/> <input type="text"/>                                           | <input type="text"/> <input type="text"/>                                           | <input type="text"/> <input type="text"/>                                           | <input type="text"/> <input type="text"/>                                           | (pg)                  |
| AST ( <i>highest</i> )        | <input type="text"/> <input type="text"/> <input type="text"/> <input type="text"/> | <input type="text"/> <input type="text"/> <input type="text"/> <input type="text"/> | <input type="text"/> <input type="text"/> <input type="text"/> <input type="text"/> | <input type="text"/> <input type="text"/> <input type="text"/> <input type="text"/> | Units / L             |
| ALT ( <i>highest</i> )        | <input type="text"/> <input type="text"/> <input type="text"/> <input type="text"/> | <input type="text"/> <input type="text"/> <input type="text"/> <input type="text"/> | <input type="text"/> <input type="text"/> <input type="text"/> <input type="text"/> | <input type="text"/> <input type="text"/> <input type="text"/> <input type="text"/> | Units / L             |

**Assessment at Discharge**Date:   /   /    **Compulsory Tests at Discharge**

| Blood Count | <input type="checkbox"/> <sub>0</sub> Not Performed                                     | <input type="checkbox"/> <sub>1</sub> Performed                                    |
|-------------|-----------------------------------------------------------------------------------------|------------------------------------------------------------------------------------|
| Platelets   | <input type="text"/> <input type="text"/> <input type="text"/> (x 10 <sup>9</sup> /L)   | Hematocrit <input type="text"/> <input type="text"/> (%)                           |
| Leukocytes  | <input type="text"/> <input type="text"/> . <input type="text"/> (x 10 <sup>9</sup> /L) | Hemoglobin <input type="text"/> <input type="text"/> . <input type="text"/> (g/dL) |
| Lymphocytes | <input type="text"/> <input type="text"/> . <input type="text"/> (x 10 <sup>9</sup> /L) | MCV <input type="text"/> <input type="text"/> (fl)                                 |
| Neutrophils | <input type="text"/> <input type="text"/> . <input type="text"/> (x 10 <sup>9</sup> /L) | MCH <input type="text"/> <input type="text"/> (pg)                                 |

**Clinical Outcome at Discharge**The patient has a clinical diagnosis of dengue <sub>0</sub> No <sub>1</sub> Yes

If the patient has a clinical diagnosis of dengue, what is the clinical outcome according to the **WHO 1997** Classification (*tick only 1 case*)

- <sub>0</sub> Uncomplicated Dengue Fever (no DHF, no DSS)
- <sub>1</sub> Dengue Hemorrhagic Fever, Grade I
- <sub>2</sub> Dengue Hemorrhagic Fever, Grade II
- <sub>3</sub> Dengue Hemorrhagic Fever, Grade III  
(Grade III = "mild" DSS: bleeding with moderate circulatory failure)
- <sub>4</sub> Dengue Hemorrhagic Fever, Grade IV  
(Grade IV = "severe" DSS: bleeding with undetectable *blood pressure*)

If the patient has a clinical diagnosis of dengue, what is the clinical outcome according to the **WHO 2009** Classification (*tick only 1 case*)

- <sub>1</sub> Dengue Fever WITHOUT any Warning Signs
- <sub>2</sub> Dengue Fever WITH Warning Sign(s)
- <sub>3</sub> Severe Dengue

The patient has a confirmed diagnosis of malaria <sub>0</sub> No <sub>1</sub> YesThe patient has a clinical diagnosis of ARI / Flu <sub>0</sub> No <sub>1</sub> YesThe patient has another clinical condition <sub>0</sub> No <sub>1</sub> Yes

If "yes", specify: .....

**Status at Discharge**

- <sub>1</sub> Recovered
- <sub>2</sub> Died
- <sub>3</sub> Transferred
- <sub>4</sub> Left against medical advice
